# Supplementary material for: Recharge Assessment in Greek Karst Systems: Methodological Considerations and Implications
Source: MDPI journal article supplement (doi:10.3390/w16040568), 2024-02-14
Supplement: s1 [file s1]

## *Supplementary materials*

### *Reliability of used data*

The most reliable databases used are:

- 1) Geological map. Initially the existing geological map of the system was digitized in GIS. Field mapping was obtained and verified the reliability of the geological formations.
- 2) DEM. During field measurements, a GPS was used to verify the reliability of the used DEM. Several points were extracted and the difference was  $\pm 0.01\text{m}$ .
- 3) Karst formation. The karst formations were obtained from air photographs using remote sensing techniques and many of them were verified with field observations.
