# Supplementary material for: Recharge Assessment in Greek Karst Systems: Methodological Considerations and Implications
Source: MDPI journal article supplement (doi:10.3390/w16040568), 2024-02-14
Supplement: s1 [file s1]

Archive with 1 entries (1 files):
- water-2765048-supplementary.pdf
